# Supplementary material for: Short-term outcomes and intermediate-term follow-up ofHelicobacter pyloriinfection treatment for naïve patients: a retrospective observational study
Source: HighWire-hosted journal article supplement (doi:10.1136/bmjopen-2022-062096), 2022-09-01
Supplement: bmjopen-2022-062096supp001_data_supplement.pdf [file bmjopen-2022-062096supp001_data_supplement.pdf]

## ONLINE SUPPLEMENTARY MATERIAL

### Supplementary File 1. The original protocol for the study

Data were searched through Electronic Medical Record System of the Second Affiliated Hospital, Zhejiang University School of Medicine (Hangzhou, China). Data extraction was performed in September 2021 by IT department.

Inclusion criteria:

1. time frame (from January 1<sup>st</sup> 2017 to December 31<sup>st</sup> 2020)
2. diagnosed with *H. pylori* infection
3. received initial PPI-bismuth-containing quadruple treatments
4. with the results of urea breath test at least 4 weeks after eradication therapy

Exclusion criteria:

1. had *H. pylori* eradication treatments before
2. changed the regimen during therapy
3. clinical data were incomplete

Patients' data were deidentified and two researchers checked the data independently. Variables included age, sex, year, prescribed treatment and outcomes.

## **Supplementary File 2. First-line Bismuth-containing quadruple therapy for *H.***

### ***pylori* infection category pools and Proton pump inhibitor categories**

1. PPI + bismuth + A + F
2. PPI + bismuth + A + C
3. PPI + bismuth + F + C
4. PPI + bismuth + A + L
5. PPI + bismuth + F + L
6. PPI + bismuth + C + L
7. Other regimens (including different first-line therapies with frequencies lower than 0.5%)

Standard dose PPI including rabeprazole 10 mg (or 20 mg), pantoprazole 40 mg, esomeprazole 20 mg, omeprazole 20 mg and lansoprazole 30mg. Bismuth-containing quadruple therapy is defined as a PPI together with two antibiotics and bismuth salts given in the standard way. A, amoxicillin; C, clarithromycin; F, furazolidone; L, levofloxacin.

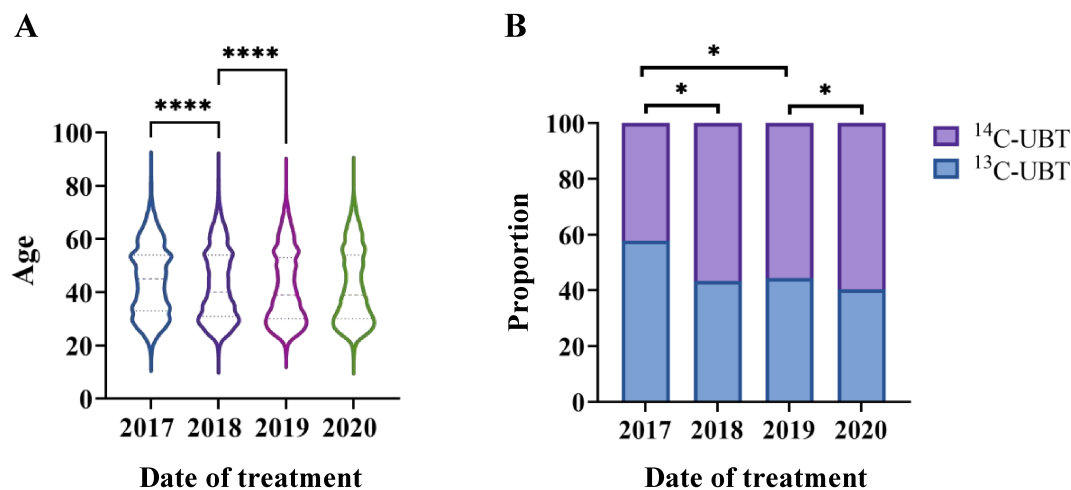

**Supplement Figure 1. Temporal trend analysis (2017–2020).**

(A) Trends in the age of patients. (B) Trends in the assessments after treatments.

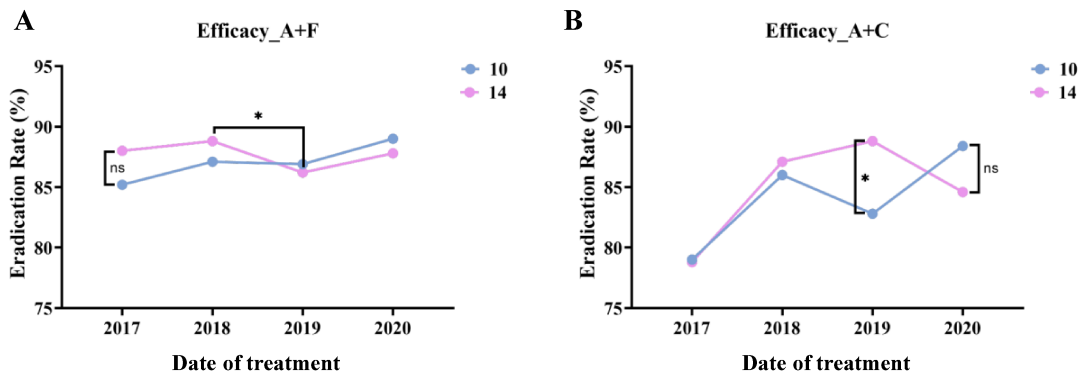

### Supplement Figure 2. Efficacy Results by treatment duration.

(A) The eradication rate of regimens with amoxicillin and furazolidone. (B) The eradication rate of regimens with amoxicillin and clarithromycin.

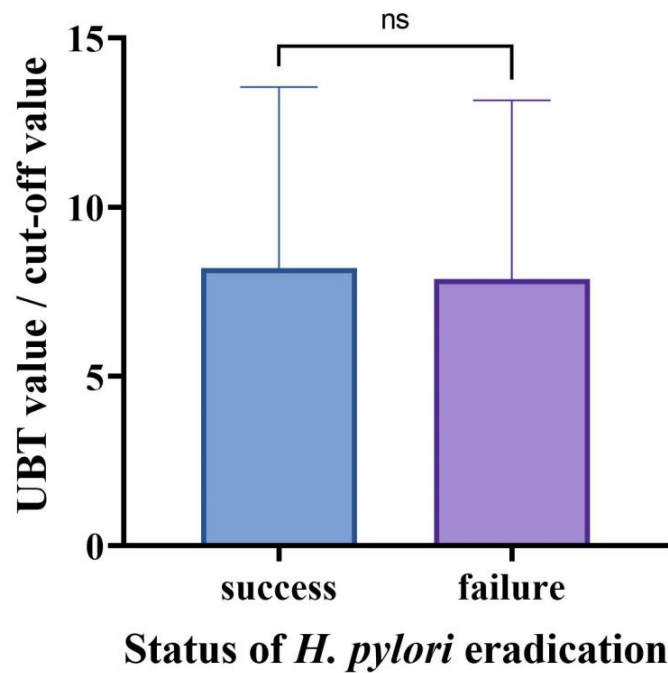

**Supplement Figure 3. The association between UBT value before treatments and the outcomes.**

Data is standardized by dividing the UBT value by the cut-off value in different tests. The cut-off value of  $^{13}\text{C}$ -UBT was 4.0‰ (delta over baseline, DOB), and that of  $^{14}\text{C}$ -UBT was 100 (disintegrations per minute, DPM).

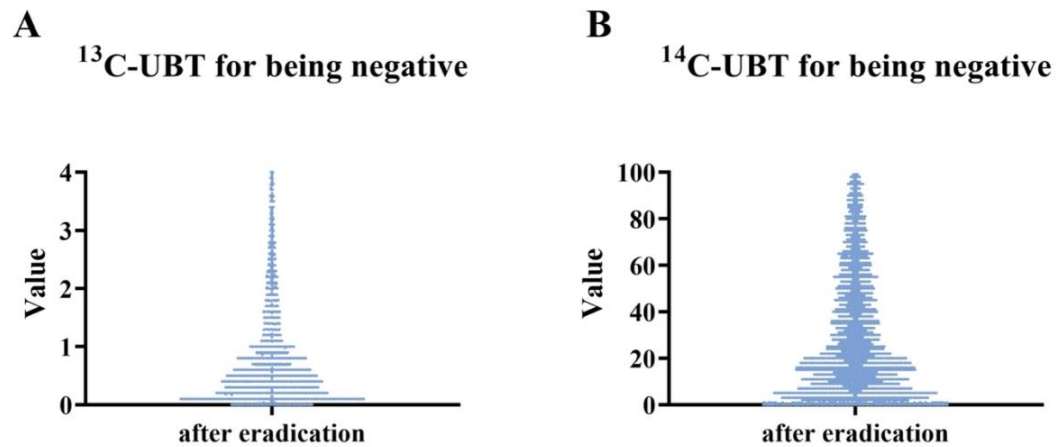

**Supplement Figure 4. Results of UBT for being negative after *H. pylori* eradication.**

(A) The scatter plot of  $^{13}\text{C}$ -UBT after *H. pylori* eradication. (B) The scatter plot of  $^{14}\text{C}$ -UBT after *H. pylori* eradication. The cut-off value of  $^{13}\text{C}$ -UBT was 4.0‰ (delta over baseline, DOB), and that of  $^{14}\text{C}$ -UBT was 100 (disintegrations per minute, DPM).

**Supplement Table 1. Effectiveness of first-line treatments per year.**

| Year | N    | Success | Eradication rate (%) |
|------|------|---------|----------------------|
| 2017 | 3957 | 3317    | 83.8%                |
| 2018 | 6486 | 5605    | 86.4%*               |
| 2019 | 7568 | 6506    | 86.0%*               |
| 2020 | 5459 | 4736    | 86.8%*               |

\*  $P < 0.05$  vs 2017.

**Supplement Table 2. Effectiveness of different first-line treatments per year.**

| Year | Regimen | N    | Success             | Eradication rate (%) |
|------|---------|------|---------------------|----------------------|
| 2017 | A + F   | 2785 | 2424 <sub>a</sub>   | 87.0%                |
|      | A + C   | 639  | 504 <sub>b</sub>    | 78.9%                |
|      | F + C   | 279  | 176 <sub>c</sub>    | 63.1%                |
|      | A + L   | 97   | 83 <sub>a, b</sub>  | 85.6%                |
|      | F + L   | 109  | 95 <sub>a, b</sub>  | 87.2%                |
|      | C + L   | 28   | 15 <sub>c</sub>     | 53.6%                |
|      | Others  | 20   | 20 <sub>a, b</sub>  | 100.0%               |
| 2018 | A + F   | 4830 | 4275 <sub>a</sub>   | 88.5%                |
|      | A + C   | 863  | 750 <sub>a</sub>    | 86.9%                |
|      | F + C   | 498  | 330 <sub>b, c</sub> | 66.3%                |
|      | A + L   | 110  | 96 <sub>a</sub>     | 87.3%                |
|      | F + L   | 122  | 107 <sub>a</sub>    | 87.7%                |
|      | C + L   | 22   | 11 <sub>c</sub>     | 50.0%                |
|      | Others  | 41   | 36 <sub>a, b</sub>  | 87.8%                |
| 2019 | A + F   | 5009 | 4344 <sub>a</sub>   | 86.7%                |
|      | A + C   | 1853 | 1611 <sub>a</sub>   | 86.9%                |
|      | F + C   | 495  | 373 <sub>b</sub>    | 75.4%                |
|      | A + L   | 81   | 67 <sub>a, b</sub>  | 82.7%                |
|      | F + L   | 93   | 86 <sub>a</sub>     | 92.5%                |
|      | C + L   | 27   | 17 <sub>b</sub>     | 63.0%                |
|      | Others  | 10   | 8 <sub>a, b</sub>   | 80.0%                |
| 2020 | A + F   | 4160 | 3664 <sub>a</sub>   | 88.1%                |
|      | A + C   | 827  | 712 <sub>a</sub>    | 86.1%                |
|      | F + C   | 397  | 298 <sub>b</sub>    | 75.1%                |
|      | A + L   | 21   | 18 <sub>a, b</sub>  | 85.7%                |
|      | F + L   | 34   | 30 <sub>a, b</sub>  | 88.2%                |
|      | C + L   | 18   | 13 <sub>a, b</sub>  | 72.2%                |
|      | Others  | 2    | 1 <sub>a, b</sub>   | 50.0%                |

Each subscript letter (a or b) denotes a subset of year categories whose column proportions do not differ significantly from each other at the .05 level. A, amoxicillin; C, clarithromycin; F, furazolidone; L, levofloxacin.



**Supplement Table 3. Recurrence after confirmation of *H. pylori* eradication with stricter criteria.**

|         | Test                | N    | Standardized positivity | Recurrence rate |
|---------|---------------------|------|-------------------------|-----------------|
| overall | overall             | 1457 | 32                      | 2.2%            |
|         | <sup>13</sup> C-UBT | 843  | 16                      |                 |
|         | <sup>14</sup> C-UBT | 751  | 16                      |                 |
| A+F     | overall             | 1192 | 21                      | 1.8%            |
|         | <sup>13</sup> C-UBT | 636  | 9                       |                 |
|         | <sup>14</sup> C-UBT | 556  | 12                      |                 |
| A+C     | overall             | 242  | 5                       | 2.1%            |
|         | <sup>13</sup> C-UBT | 126  | 4                       |                 |
|         | <sup>14</sup> C-UBT | 116  | 1                       |                 |

Standardized positivity was defined by over 10‰ in <sup>13</sup>C-UBT and over 250 in <sup>14</sup>C-UBT. A, amoxicillin; C, clarithromycin; F, furazolidone.
